# Supplementary material for: Predicting and characterizing selective multiple drug treatments for metabolic diseases and cancer
Source: PubMed Central journal article supplement (PMC3744170; doi:10.1186/1752-0509-6-115), 2012-08-29
Supplement: 1752-0509-6-115-S3.pdf [file 1752-0509-6-115-S3.pdf]

**Table S3 - Cancer vs human network: solutions with an additional target.**

Additional targets in boldface are those for which an experimental drug (other than the approved drugs listed in DrugBank) could be found in the literature.

| <i>Pathway</i>    | <i>Additional target</i>                                   | Mimosine (#63) | Canaline (#81) | Lithium (#78) | Dorzolamide (#14) | Trichlormethiazide (#61) | Cerulenin (#62) | Orlistat (#65) | Droxidopa (#24) | Pentoxifyline (#50) | Zonisamide (#54) | Sulfasalazine (#48) | Carmustine (#17) - Fomepizole (#75) | <b>Rosiglitazone (#7) - Cerulenin (#62)</b> | Rosiglitazone (#7) - Orlistat (#65) | Carmustine (#17) - Cefdinir (#32) - Fomepizole (#75) | Disulfiram (#53) - Mimosine (#63) - Icatibant (#84) |
|-------------------|------------------------------------------------------------|----------------|----------------|---------------|-------------------|--------------------------|-----------------|----------------|-----------------|---------------------|------------------|---------------------|-------------------------------------|---------------------------------------------|-------------------------------------|------------------------------------------------------|-----------------------------------------------------|
| Cysteine met.     | Glutathione:cystine oxidoreductase                         |                |                |               |                   |                          |                 |                |                 |                     |                  |                     | 116                                 |                                             |                                     | 116                                                  |                                                     |
| Exchange          | Bicarbonate exchange                                       |                |                |               | 62                | 71                       |                 |                |                 |                     | 247              |                     |                                     |                                             |                                     |                                                      |                                                     |
|                   | Phosphatidylcholine exchange                               |                |                |               |                   |                          |                 |                |                 |                     |                  |                     |                                     | <b>108</b>                                  | 116                                 |                                                      |                                                     |
|                   | Glycine exchange                                           |                |                |               |                   |                          |                 |                |                 |                     |                  |                     |                                     |                                             |                                     |                                                      | 132                                                 |
|                   | L-Cystine exchange                                         |                |                |               |                   |                          |                 |                |                 |                     |                  |                     | 116                                 |                                             |                                     |                                                      |                                                     |
|                   | L-Tyrosine exchange                                        |                |                |               |                   |                          |                 |                | 86              |                     |                  |                     |                                     |                                             |                                     |                                                      |                                                     |
|                   | myo-Inositol exchange                                      |                |                | 43            |                   |                          |                 |                |                 |                     |                  |                     |                                     |                                             |                                     |                                                      |                                                     |
|                   | L-Arginine exchange                                        |                | 33             |               |                   |                          |                 |                |                 |                     |                  |                     |                                     |                                             |                                     |                                                      |                                                     |
| Fatty acid elong. | <b>palmitoyl-CoA desaturase<sup>a</sup></b>                |                |                |               |                   |                          | <b>47</b>       | <b>55</b>      |                 |                     |                  |                     |                                     |                                             |                                     |                                                      |                                                     |
| Folate met.       | <b>methenyltetrahydrofolate cyclohydrolase<sup>b</sup></b> | <b>29</b>      |                |               |                   |                          |                 |                |                 |                     |                  |                     |                                     |                                             |                                     |                                                      |                                                     |
| Lysine met.       | 2-Oxoadipate:lipoamide 2-oxidoreductase                    |                |                |               |                   |                          |                 |                |                 |                     |                  |                     | 138                                 |                                             |                                     |                                                      |                                                     |
| Nucleotides       | guanylate kinase (GMP:ATP)                                 |                |                |               |                   |                          |                 |                |                 |                     |                  |                     | 62                                  |                                             |                                     |                                                      |                                                     |
|                   | adenylate kinase (d form)                                  |                |                |               |                   |                          |                 |                |                 |                     |                  |                     | 62                                  |                                             |                                     |                                                      |                                                     |
|                   | ribonucleoside-diphosphate reductase (GDP)                 |                |                |               |                   |                          |                 |                |                 |                     |                  |                     | 62                                  |                                             |                                     |                                                      |                                                     |
|                   | ribonucleoside-diphosphate reductase (ADP)                 |                |                |               |                   |                          |                 |                |                 |                     |                  |                     | 60                                  |                                             |                                     |                                                      |                                                     |
| Oxidative Phosph. | inorganic diphosphatase                                    |                |                |               |                   |                          |                 |                |                 |                     |                  |                     | 317                                 |                                             |                                     |                                                      |                                                     |
| R Group Synth.    | R group to palmitate conversion                            |                |                |               |                   |                          |                 |                |                 |                     |                  |                     |                                     | <b>89</b>                                   | 97                                  |                                                      |                                                     |
|                   | R group artificial flux (C16:1)                            |                |                |               |                   |                          | 44              | 52             |                 |                     |                  |                     |                                     |                                             |                                     |                                                      |                                                     |
| Transport         | phosphatidylcholine transporter                            |                |                |               |                   |                          |                 |                |                 |                     |                  |                     |                                     | <b>108</b>                                  | 116                                 |                                                      |                                                     |
|                   | L-tyrosine transport                                       |                |                |               |                   |                          |                 |                | 86              |                     |                  |                     |                                     |                                             |                                     |                                                      |                                                     |
| Tryptophan met.   | 2-oxoadipate shuttle                                       |                |                |               |                   |                          |                 |                |                 |                     |                  |                     | 138                                 |                                             |                                     |                                                      |                                                     |
|                   | <b>3-hydroxyacyl-CoA dehydratase<sup>c</sup></b>           |                |                |               |                   |                          |                 |                |                 |                     |                  |                     | <b>138</b>                          |                                             |                                     |                                                      |                                                     |
|                   | <b>3-hydroxyacyl-CoA dehydrogenase<sup>c</sup></b>         |                |                |               |                   |                          |                 |                |                 |                     |                  |                     | <b>138</b>                          |                                             |                                     |                                                      |                                                     |
|                   | <b>glutaryl-CoA dehydrogenase<sup>d</sup></b>              |                |                |               |                   |                          |                 |                |                 |                     |                  |                     | <b>138</b>                          |                                             |                                     |                                                      |                                                     |

<sup>a</sup>: inhibited by 5,6,7,8- tetrahydro-N<sup>9</sup>,N<sup>10</sup>- carbonylfolic acid [49];

<sup>b</sup>: inhibited by isomeric cis-octadecenoic acids [57];

<sup>c</sup>: inhibited by perfluorodecanoic acid [58];

<sup>d</sup>: inhibited by spiropentaneacetic acid [59].
